# Supplementary material for: SIRT1 regulates hepatic vldlr levels
Source: PubMed Central journal article supplement (PMC11134955; doi:10.1186/s12964-024-01666-y), 2024-05-28

Fig1h

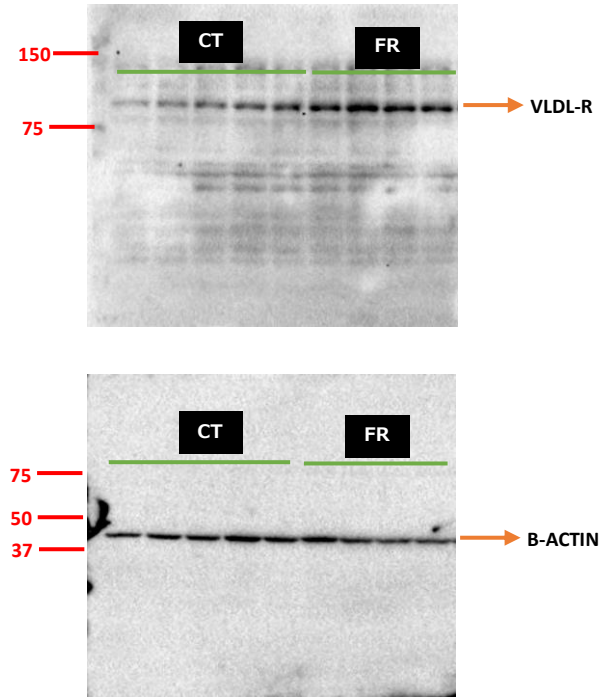

Fig1i

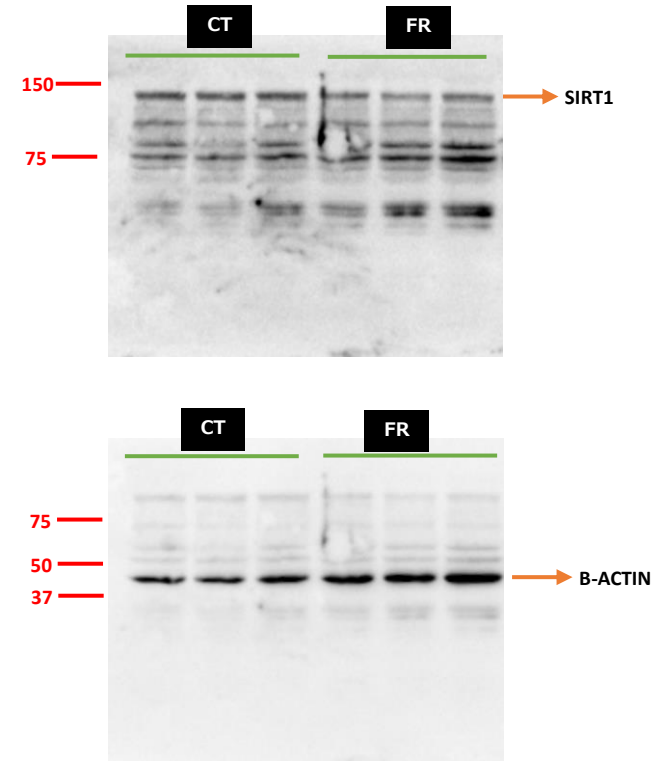

Fig2a

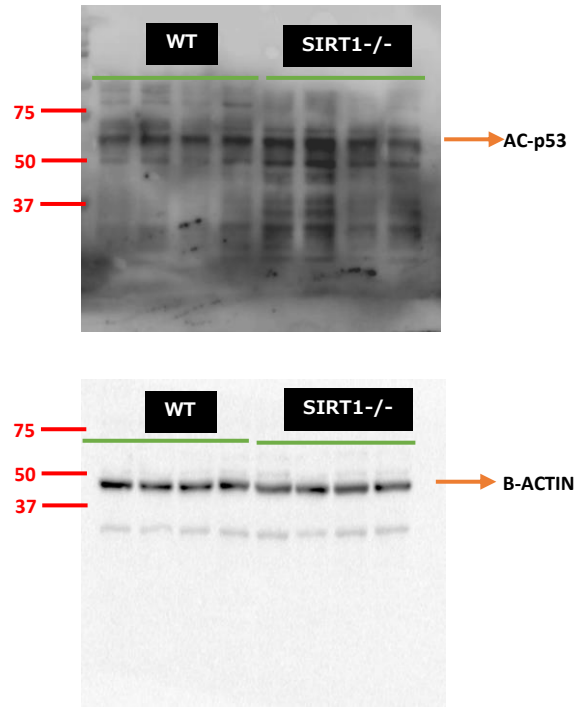

Fig2c

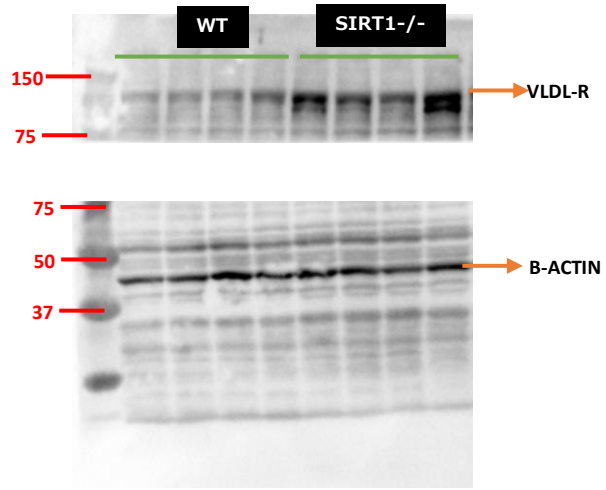

Fig2d

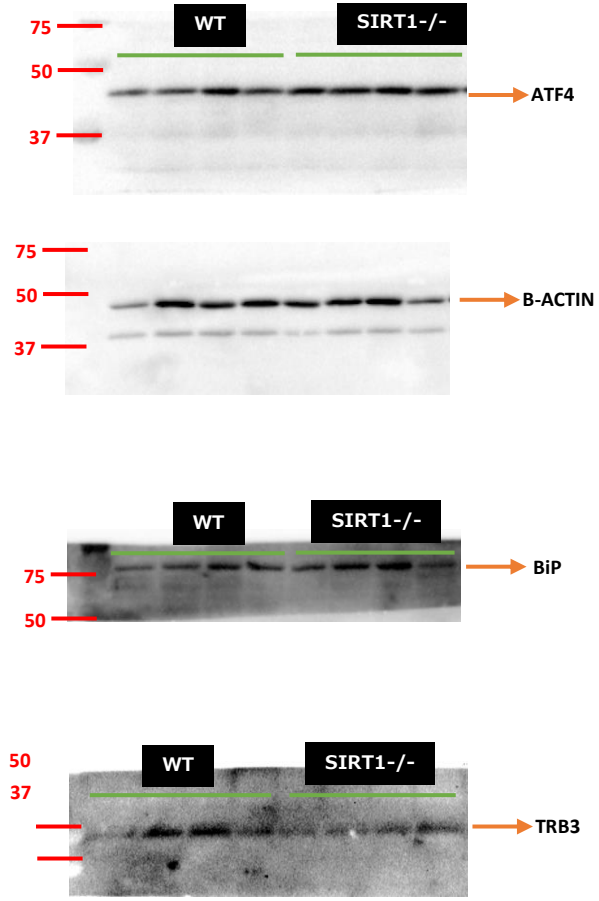

Fig2e

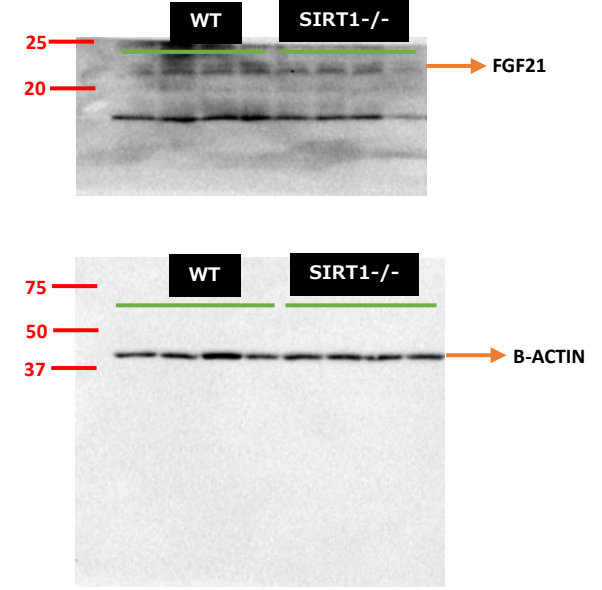

Fig2f

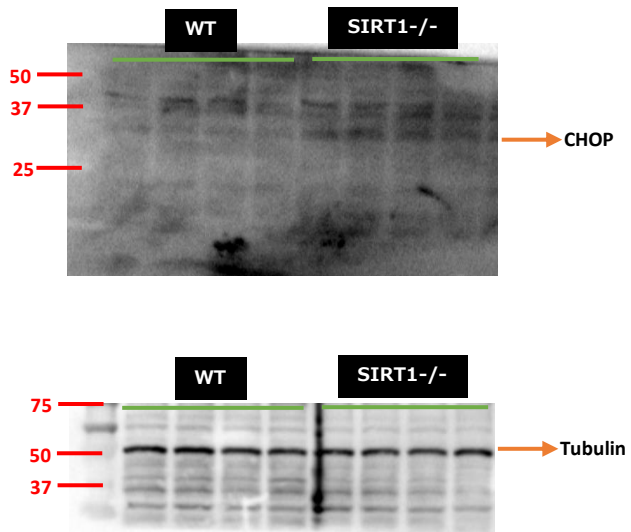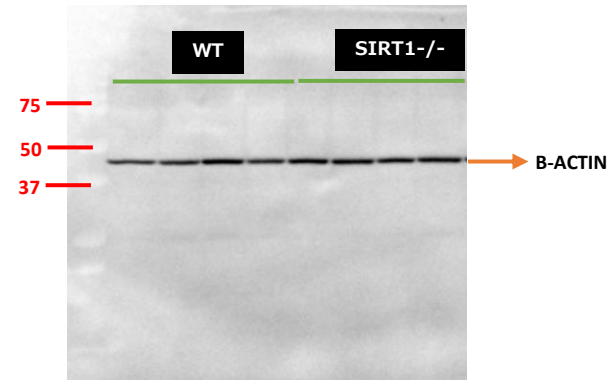

Fig3a

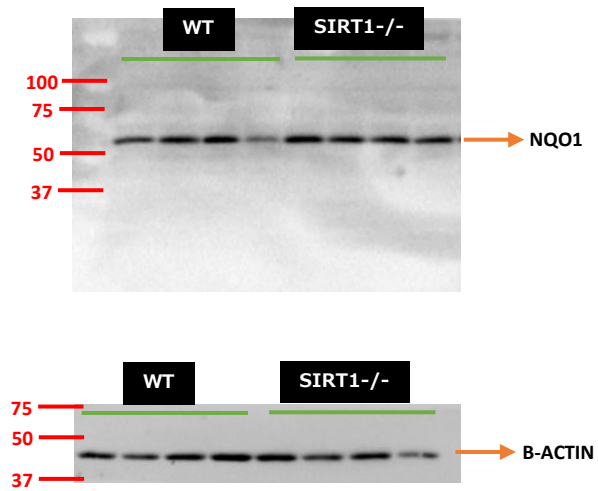

Fig3b

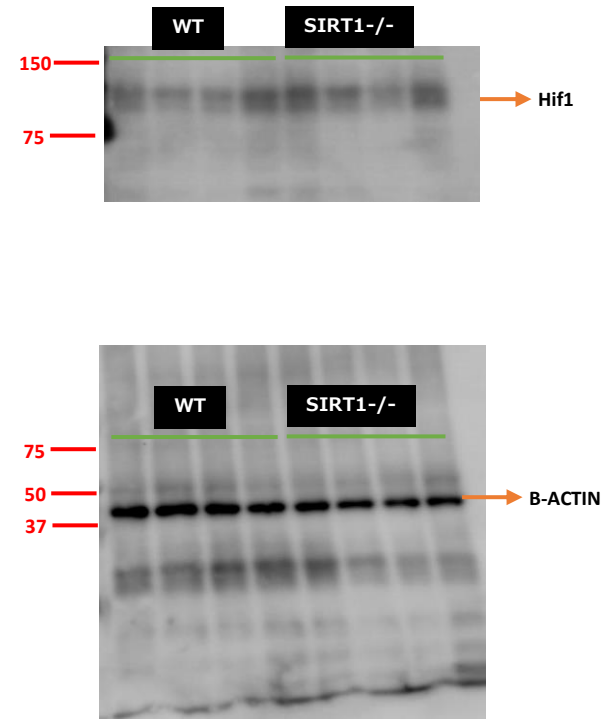

Fig4b

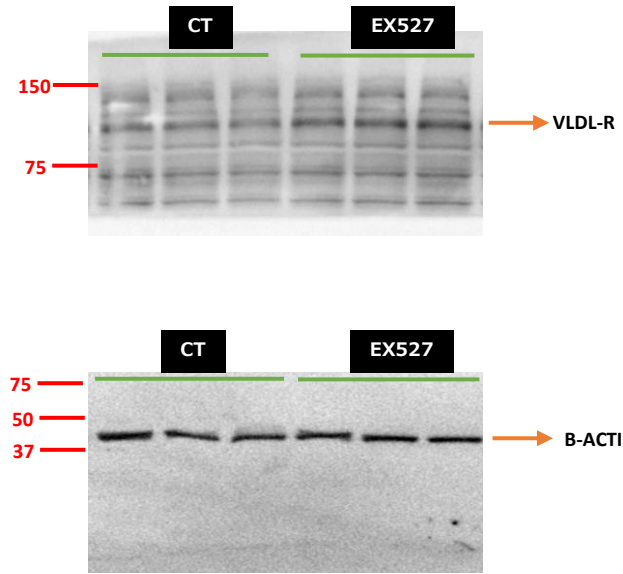

Fig4c

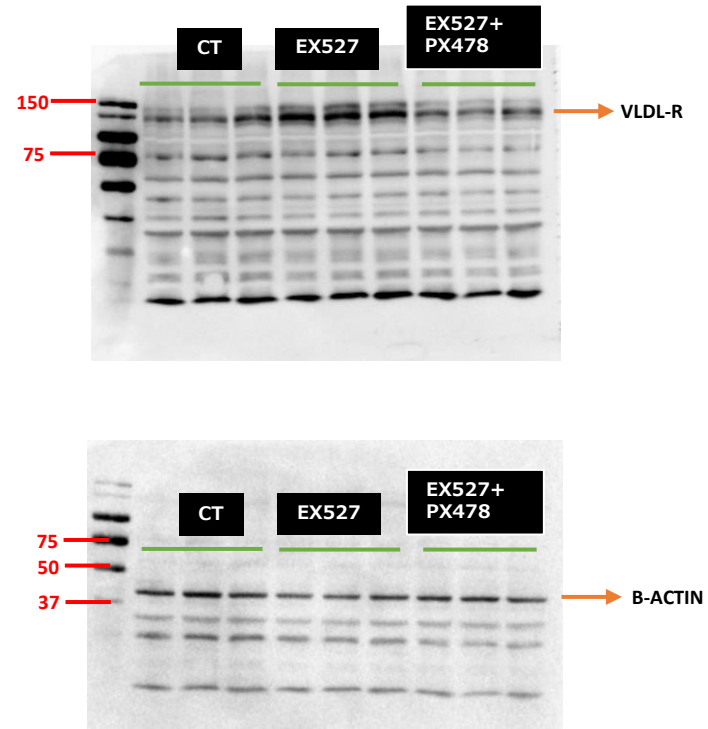

Fig4e

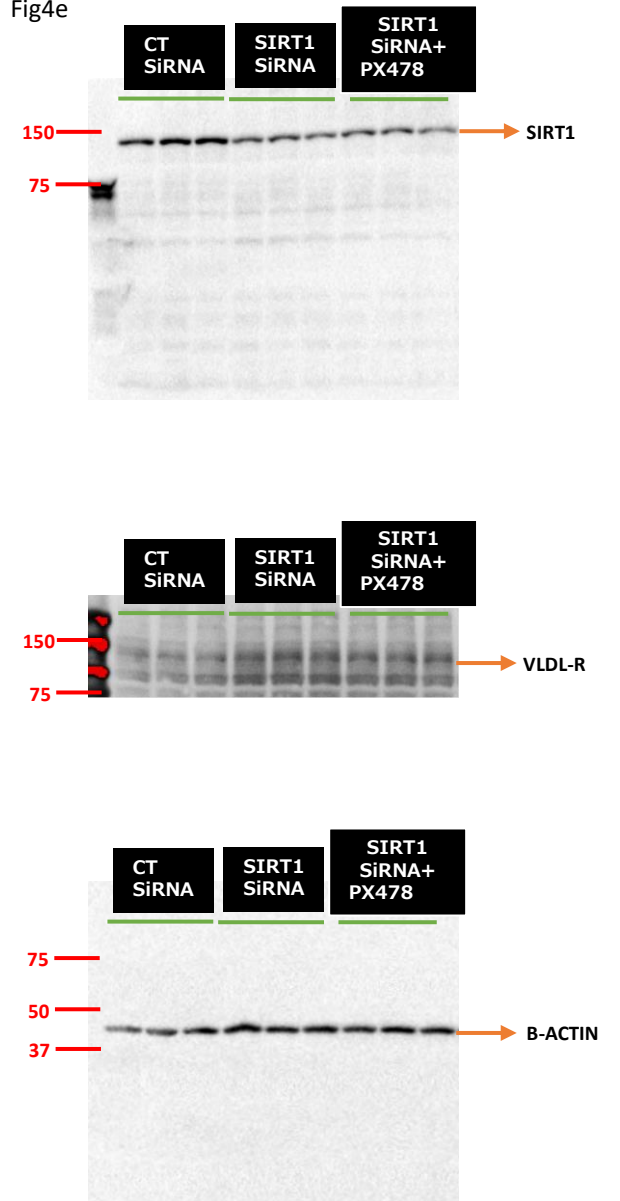

Fig5a

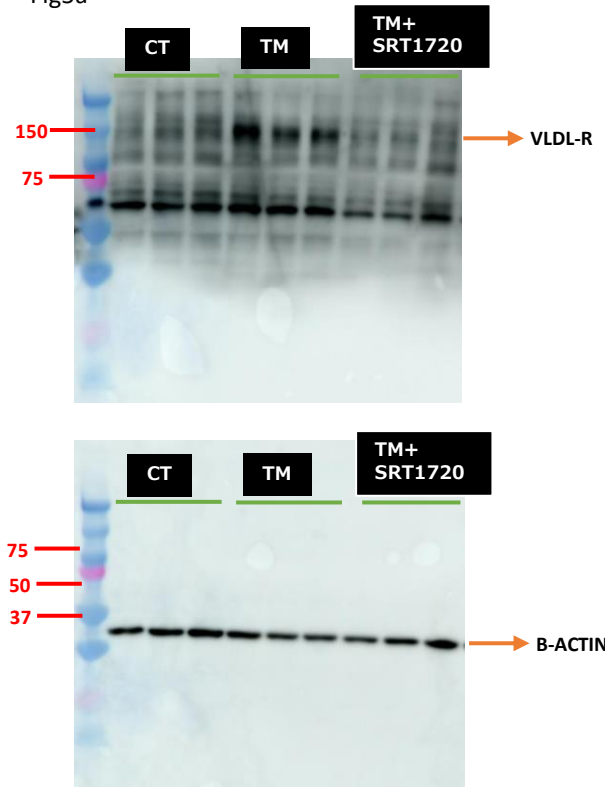

Fig5e

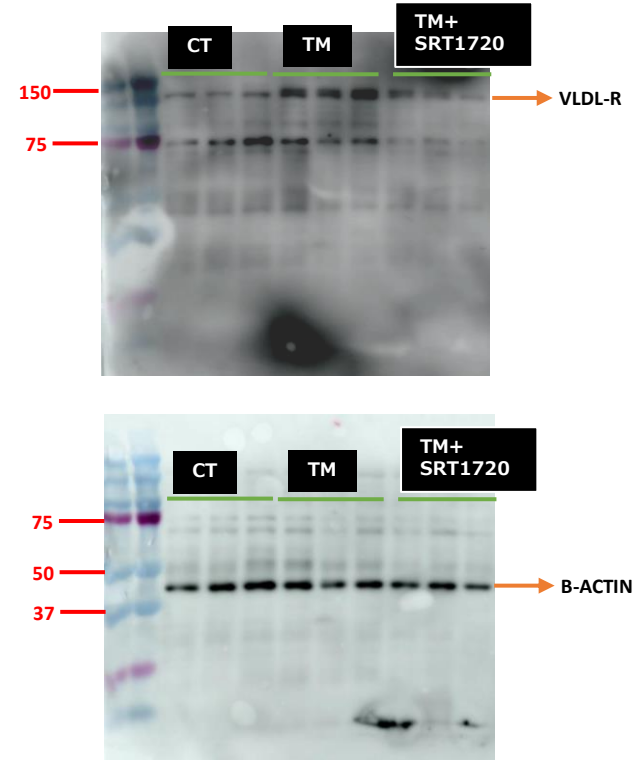

Supplementary Figure 1

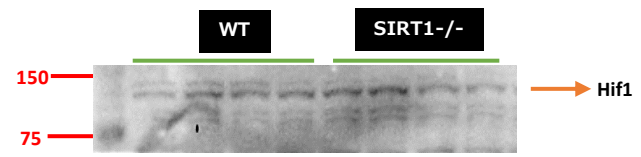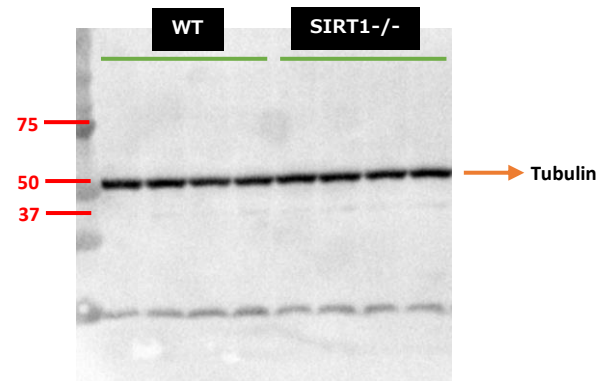

Supplement: 12964_2024_1666_MOESM3_ESM.pdf [file 12964_2024_1666_MOESM3_ESM.pdf]
